# Supplementary material
Source: PubMed Central journal article supplement (PMC7598566)
Supplement: mmc2.pdf [file mmc2.pdf]

**Supplementary Table S1:** Homologous Models with percentage identity.

| Homologous Model | % Identity |
|------------------|------------|
| 5CE1-A           | 43         |
| 3W94-A           | 42.80      |
| 5TJX-A           | 42.56      |
| 2ANY-A           | 42.50      |
| 5F8T-A           | 42.50      |
| 2ANW-A           | 42.50      |
| 5GVT-A           | 42.26      |
| 6A8O-A           | 42.26      |

**Supplementary Table S2:** The structure files and Pharmacological relevance of the Marketed drugs studied.

| S.no. | Marketed Drugs | Canonical Smiles                                                                   | Pharmacological Relevance (inhibition of) |
|-------|----------------|------------------------------------------------------------------------------------|-------------------------------------------|
| 1.    | Camostat       | <chem>CN(C)C(=O)COC(=O)CC1=CC=C(C=C1)OC(=O)C2=CC=C(C=C2)N=C(N)N.CS(=O)(=O)O</chem> | Lysine analogue - Serine Protease         |
| 2.    | 3-TAPAP        | <chem>CC1=CC=C(C=C1)S(=O)(=O)NC(CC2=CC(=CC=C2)C(=N)N)C(=O)N3CCCCC3</chem>          | Serine Protease                           |
| 3.    | DIF (Di-       | <chem>CC(C)OP(=O)(OC(C)C)F</chem>                                                  | Broad spectrum Serine Protease Inhibitor  |

|    |                                                             |                                                                                                        |                                                             |
|----|-------------------------------------------------------------|--------------------------------------------------------------------------------------------------------|-------------------------------------------------------------|
|    | isopropyl<br>fluoro<br>phosphate)                           |                                                                                                        |                                                             |
| 4. | Meloxicam,                                                  | <chem>C1=CC(=C(C(=C1)O)O)C(=O)NCC2=CC(=CC(=C2)CNC(=O)C3=C(C(=CC=C3)O)O)CNC(=O)C4=C(C(=CC=C4)O)O</chem> | NSAID<br>Repurposed as Lysine analogue Serine<br>Protease   |
| 5. | AEBSF (4-(2-<br>Aminoethyl)<br>benzenesulfonyl<br>fluoride) | <chem>C1=CC(=CC=C1CCN)S(=O)(=O)F</chem>                                                                | Lysine analogue - Serine Protease                           |
| 6. | P-Amino<br>benzamidine                                      | <chem>C1=CC(=CC=C1C(=[NH2+])N)N</chem>                                                                 | Lysine analogue - Serine Protease                           |
| 7. | Nafamostat                                                  | <chem>C1=CC(=CC=C1C(=O)OC2=CC3=C(C=C2)C=C(C=C3)C(=N)N)N=C(N)N</chem>                                   | Lysine analogue - Serine Protease                           |
| 8. | Ulinastatin                                                 | <chem>C1CC2(CC=C1)COC(OC2)C3=CC=CO3</chem>                                                             | Anticoagulant, repurposed as Trypsin<br>Protease inhibitor. |

**Supplementary Table S3:** The structure files, Sources and Antiviral relevance of the natural compounds studied.

| S.no. | Compound Name    | Canonical SMILES                                    | Source                                                                                                      | Antiviral Relevance against. (1)                                              |
|-------|------------------|-----------------------------------------------------|-------------------------------------------------------------------------------------------------------------|-------------------------------------------------------------------------------|
| 1.    | Tetratriacontane | CCCCCCCCCCCCCCCCCCCCCCCC<br>CCCCCCCCCCCC            | Neem, <i>Plectranthus amboinicus</i> Leaves, (2)<br>Calligonum polygonoides, <i>Crateva Adansonii</i> . (3) | Influenzavirus- NS1 Protein                                                   |
| 2.    | Baicalein        | C1=CC=C(C=C1)C2=CC(=O)C3=C(O2)C=C(C(=C3O)O)O        | Isoflavanoid, <i>Scutellaria baicalensis</i>                                                                | DENV E Protein (4)                                                            |
| 3.    | Hesperetin       | COC1=C(C=C(C=C1)C2CC(=O)C3=C(C=C(C=C3O2)O)O)O       | Isoflavanoid, citrus fruit juice                                                                            | DENV E Protein, RNA Virus.                                                    |
| 4.    | Fisetin          | C1=CC(=C(C=C1)C2=C(C(=O)C3=C(O2)C=C(C=C3)O)O)O      | Flavanones, trawberry, apple, persimmon, grape, onion, and cucumber.(5)                                     | DENV E Protein. (6)                                                           |
| 5.    | Naringenin       | C1[C@H](OC2=CC(=CC(=C2C1=O)O)O)C3=CC=C(C=C3)O       | Flavanones, citrus fruit juice                                                                              | DENV E Protein,                                                               |
| 6.    | Myricetin        | C1=C(C=C(C(=C1O)O)O)C2=C(C(=O)C3=C(C=C(C=C3O2)O)O)O | <i>Isatis indigotica</i> and <i>Torreya nucifera</i>                                                        | nsP13 helicase and 3CL protease of SARS-CoV, Reverse transcriptase, Protease. |
| 7.    | 3,4-             | C1=CC=C2C(=C1)C(=C(OC2=O)Cl)                        | Cinnamon                                                                                                    | Protease.                                                                     |

|     |                                                                  |                                                                                                                                                      |                          |                                                   |
|-----|------------------------------------------------------------------|------------------------------------------------------------------------------------------------------------------------------------------------------|--------------------------|---------------------------------------------------|
|     | Dichloroisocoumarin                                              | Cl                                                                                                                                                   |                          |                                                   |
| 8.  | APMSF<br>(4-Amidinophenylmethanesulfonyl fluoride hydrochloride) | <chem>C1=CC(=CC=C1CS(=O)(=O)F)C(=N)N.Cl</chem>                                                                                                       | Lychee seeds             | Protease                                          |
| 9.  | Aesculitannin B                                                  | <chem>C1C(C(OC2=C1C(=CC(=C2C3C(C(OC4=C3C(=CC5=C4C6C(C(O5)(OC7=CC(=CC(=C67)O)O)C8=CC(=C(C=C8)O)O)O)C9=CC(=C(C=C9)O)O)O)O)O)C1=CC(=C(C=C1)O)O)O</chem> | Lychee seeds             | HSV-1                                             |
| 10. | Proanthocyanidine A2                                             | <chem>C1C(C(OC2=C1C(=CC3=C2C4C(C(O3)(OC5=CC(=CC(=C45)O)O)C6=CC(=C(C=C6)O)O)O)O)C7=CC(=C(C=C7)O)O)O</chem>                                            | Lychee seeds             | HSV-1                                             |
| 11. | Ganoderiol D                                                     | <chem>CC(CCC(C(C)(CO)O)O)C1CCC2(C1(CCC3=C2C(=O)CC4C3(CCC(=O)C4(C)C)C)C)C</chem>                                                                      | <i>Ganoderma lucidum</i> | HIV Protease                                      |
| 12. | Ganodermanontriol                                                | <chem>CC(CCC(C(C)(CO)O)O)C1CCC2(C1(CC=C3C2=CCC4C3(CCC(=O)C4(C)C)C)C)C</chem>                                                                         | <i>Ganoderma lucidum</i> | HIV Protease, Plasmepsin-1, Telomerase inhibitors |

|     |                  |                                                                              |                             |                                                           |
|-----|------------------|------------------------------------------------------------------------------|-----------------------------|-----------------------------------------------------------|
| 13. | Columbin         | <chem>CC12CCC3C(=O)OC(CC3(C1C4C=CC2(C(=O)O4)O)C)C5=COC=C5</chem>             | <i>Tenospora cardifolia</i> | HIV Protease,                                             |
| 14. | Ecdysterone      | <chem>CC12CCC3C(=CC(=O)C4C3(CC(C(C4)O)O)C)C1(CCC2C(C)(C(CCC(C)C)O)O)O</chem> | <i>Tenospora cardifolia</i> | HIV Protease,                                             |
| 15. | Magnoflorine     | <chem>C[N+](CCC2=CC(=C(C3=C2C1C4=C3C(=C(C=C4)OC)O)O)OC)C</chem>              | <i>Tenospora cardifolia</i> | HIV Protease,                                             |
| 16. | Jatrorrhizine    | <chem>COC1=C(C2=C[N+](3=C(C=C2C=C1)C4=CC(=C(C=C4CC3)O)OC)OC</chem>           | <i>Tenospora cardifolia</i> | HIV Protease,                                             |
| 17. | Cis capsaicin    | <chem>CC(C)C=CCCCC(=O)NCC1=CC(=C(C=C1)O)OC</chem>                            | <i>Capsicum baccatum</i>    | HSV virus in guinea pigs, blocks viral replication cycle. |
| 18. | Dihydrocapsaicin | <chem>CC(C)CCCCCCC(=O)NCC1=CC(=C(C=C1)O)OC</chem>                            | <i>Capsicum baccatum</i>    | Trypsin Protease                                          |

**Supplementary Table S4:** Amino acid sequence of TMPRSS2 protein

| Seq no. | Amino acid Sequence                                                    |
|---------|------------------------------------------------------------------------|
| 1-70    | MALNSGSPAIGPYYENHGYQPENPYPAQPTVVPTVYEVHPAQYYPSPVPQYAPRVLTQASNPVVCTQPK  |
| 70-140  | SPSGTVCTSKTKKALCITLTLGTFLVGAALAAGLLWKFMSGKCSNSGIECDSSGTCINPSNWCDGVSHCP |

|         |                                                                        |
|---------|------------------------------------------------------------------------|
| 140-210 | GGEDENRCVRLYGPNFILQVYSSQRKSWHPVCQDDWNENYGRAACRDMGYKNNFYSSQGIVDDSGSTSM  |
| 210-280 | KLNTSAGNVDIYKKLYHSDACSSKAVVSLRCIACGVNLNSSRQSRIVGGESALPGAWPWQVSLHVQNVHV |
| 280-350 | CGGSIITPEWIVTAAHCVEKPLNNPWHWTAFAGILRQSFMYGAGYQVEKVISHPNYDSKTKNNDIALMK  |
| 350-420 | LQKPLTFNDLVKPVCLPNPGMMLQPEQLCWISGWGATEEKGKTSEVLNAAKVLLIETQRCNSRYVYDNLI |
| 420-490 | TPAMICAGFLQGNVDSCQGDSGGPLVTSKNNIWWLIGDTSWGSACAAYRPGVYGNVMVFTDWIYRQMRA  |
| 490-492 | DG                                                                     |

**Supplementary Table S5: Summary of quality check and validation scores of TMPRSS2 homology model**

| <b>Server/tool</b>           | <b>Parameter</b>           | <b>Score</b>  |
|------------------------------|----------------------------|---------------|
| SWISS-MODEL                  | Q Mean                     | -1.43         |
| ProSA-web                    | Z-Score                    | -8.67         |
| PROCHECK (Ramachandran plot) | Most favored regions       | 92.2%         |
|                              | Additional allowed regions | 7.5%          |
|                              | Disallowed regions         | 0.3%          |
| ERRAT plot                   | Overall quality factor     | 91.67%        |
| verify 3D                    | Averaged 3D-1D>0.2         | 95.38% (Pass) |
| SOSUI                        | Signal peptide             | 0             |
|                              | Protein type               | Soluble       |
|                              | Expression                 | Extracellular |

**Supplementary Table S6:** Physicochemical characterization of TMPRSS2

| <b>Physico chemical property</b>        | <b>Value</b>                                  |
|-----------------------------------------|-----------------------------------------------|
| Number of amino acids                   | 347                                           |
| Molecular weight                        | 38610.95                                      |
| Theoretical pI                          | 8.58                                          |
| Ext. coefficient                        | 94725                                         |
| estimated half-life                     | 1.4 hours                                     |
| Aliphatic index                         | 76.11                                         |
| Grand average of hydropathicity (GRAVY) | -0.260                                        |
| instability index (II)                  | 35.11 (This classifies the protein as stable) |



**Supplementary Table S7:** Active site (or) pockets in the 3D structured model of TMPRSS2

| Name            | Volume Å <sup>3</sup> | Surface Å <sup>2</sup> | Drug Score | Simple Score | Amino acid Residues                                                                                                                                                                                                                                                                                                                                                                                                                                                                                                                                                                                                                                                                                                  |
|-----------------|-----------------------|------------------------|------------|--------------|----------------------------------------------------------------------------------------------------------------------------------------------------------------------------------------------------------------------------------------------------------------------------------------------------------------------------------------------------------------------------------------------------------------------------------------------------------------------------------------------------------------------------------------------------------------------------------------------------------------------------------------------------------------------------------------------------------------------|
| P_0<br>Pocket 0 | 1233.73               | 1900.73                | 0.81       | 0.65         | ARG_147_A; CYS_148_A; VAL_149_A; ARG_150_A; LEU_151_A; TYR_152_A; GLY_153_A; PHE_156_A; ILE_157_A; GLN_159_A; TRP_168_A; ARG_182_A; ALA_183_A; ARG_186_A; ASP_187_A; MET_188_A; GLY_189_A; TYR_190_A; LYS_191_A; ASN_192_A; PHE_194_A; ASP_220_A; ILE_221_A; TYR_222_A; LYS_223_A; ARG_240_A; CYS_241_A; ILE_242_A; ALA_243_A; CYS_244_A; GLY_245_A; VAL_246_A; ASN_247_A; VAL_271_A; ILE_285_A; ILE_286_A; THR_287_A; PRO_288_A; GLU_289_A; TRP_290_A; ILE_291_A; LEU_351_A; LEU_355_A; THR_356_A; PHE_357_A; VAL_361_A; LYS_362_A; PRO_363_A; VAL_364_A; CYS_365_A; LEU_366_A; PRO_367_A; ASN_368_A; PRO_369_A; GLY_370_A; ILE_452_A; TRP_454_A; MET_478_A; THR_481_A; ASP_482_A; ILE_484_A; TYR_485_A; MET_488_A. |

|     |        |        |      |      |                                                                                                                                                                                                                                                                                                                                                                                                                                                                                                                                                                                                                                                                                                                      |
|-----|--------|--------|------|------|----------------------------------------------------------------------------------------------------------------------------------------------------------------------------------------------------------------------------------------------------------------------------------------------------------------------------------------------------------------------------------------------------------------------------------------------------------------------------------------------------------------------------------------------------------------------------------------------------------------------------------------------------------------------------------------------------------------------|
| P_1 | 416.13 | 670.82 | 0.82 | 0.16 | ARG_147_A; CYS_148_A; VAL_149_A; ARG_150_A; LEU_151_A; TYR_152_A; GLY_153_A; PHE_156_A; ILE_157_A; GLN_159_A; TRP_168_A; ARG_182_A; ALA_183_A; ARG_186_A; ASP_187_A; MET_188_A; GLY_189_A; TYR_190_A; LYS_191_A; ASN_192_A; PHE_194_A; ASP_220_A; ILE_221_A; TYR_222_A; LYS_223_A; ARG_240_A; CYS_241_A; ILE_242_A; ALA_243_A; CYS_244_A; GLY_245_A; VAL_246_A; ASN_247_A; VAL_271_A; ILE_285_A; ILE_286_A; THR_287_A; PRO_288_A; GLU_289_A; TRP_290_A; ILE_291_A; LEU_351_A; LEU_355_A; THR_356_A; PHE_357_A; VAL_361_A; LYS_362_A; PRO_363_A; VAL_364_A; CYS_365_A; LEU_366_A; PRO_367_A; ASN_368_A; PRO_369_A; GLY_370_A; ILE_452_A; TRP_454_A; MET_478_A; THR_481_A; ASP_482_A; ILE_484_A; TYR_485_A; MET_488_A. |
| P_2 | 404.99 | 488.54 | 0.7  | 0.16 | GLY_259_A; GLN_270_A; VAL_271_A; HIS_279_A; CYS_281_A; GLY_282_A; GLY_283_A; ILE_381_A; SER_382_A; GLY_383_A; TRP_384_A; GLY_385_A; ALA_386_A; THR_387_A; GLU_388_A; SER_394_A; LEU_397_A; ASN_398_A; ALA_399_A; ALA_400_A; ASN_433_A; VAL_434_A; ASP_435_A; SER_436_A; CYS_437_A; GLY_439_A; ASP_440_A; <b>SER_441_A</b> ; GLY_443_A; PRO_444_A; LEU_445_A; ASP_458_A; THR_459_A; CYS_465_A; ALA_466_A; TYR_474_A.                                                                                                                                                                                                                                                                                                  |

|     |        |        |      |      |                                                                                                                                                                                                                                                                                                                                                                                                                         |
|-----|--------|--------|------|------|-------------------------------------------------------------------------------------------------------------------------------------------------------------------------------------------------------------------------------------------------------------------------------------------------------------------------------------------------------------------------------------------------------------------------|
| P_3 | 381.38 | 815.26 | 0.53 | 0.18 | GLY_245_A; VAL_246_A ; ASN_247_A; LEU_248_A; ASN_249_A;<br>SER_250_A; ARG_252_A; GLN_253_A; SER_254_A; ARG_255_A;<br>LEU_263_A; PRO_264_A; GLY_265_A; ALA_266_A ; ASP_359_A;<br>LEU_360_A; LYS_362_A; SER_448_A; ASN_451_A; ILE_452_A;<br>TRP_453_A.                                                                                                                                                                    |
| P_4 | 336.19 | 488.29 | 0.71 | 0.09 | <b>HIS_296_A</b> ; GLU_389_A; VAL_402_A; ILE_405_A; TYR_416_A;<br>ALA_427_A; GLY_428_A; PHE_429_A; LEU_430_A; GLY_432_A;<br>ASN_433_A; VAL_434_A; ASP_435_A; SER_436_A; CYS_437_A;<br>GLN_438_A; ASP_440_A; <b>SER_441_A</b> ; THR_459_A; SER_460_A;<br>TRP_461_A; GLY_462_A; SER_463_A; GLY_464_A; CYS_465_A;<br>ALA_466_A; LYS_467_A; ALA_468_A; TYR_469_A; ARG_470_A;<br>PRO_471_A; GLY_472_A; VAL_473_A; TYR_474_A. |
| P_5 | 259.26 | 522.54 | 0.47 | 0.17 | GLU_376_A; LEU_403_A; LEU_404_A; ILE_405_A; ARG_409_A;<br>CYS_410_A; SER_412_A; TYR_414_A; VAL_415_A; GLY_428_A;<br>PHE_429_A; LEU_430_A; ALA_468_A; TYR_469_A; ARG_470_A;<br>PRO_471_A.                                                                                                                                                                                                                                |
| P_6 | 200.32 | 278.85 | 0.47 | 0.01 | LEU_273_A; CYS_281_A; THR_293_A; ALA_294_A; ALA_295_A;<br>CYS_297_A; VAL_298_A; LEU_302_A; ASN_303_A; ASN_304_A;<br>PRO_305_A; TRP_308_A; VAL_328_A; LYS_330_A; VAL_331_A;<br>ALA_347_A; LEU_348_A; MET_349_A.                                                                                                                                                                                                          |

|      |        |        |      |     |                                                                                                                                                                                                                             |
|------|--------|--------|------|-----|-----------------------------------------------------------------------------------------------------------------------------------------------------------------------------------------------------------------------------|
| P_7  | 169.22 | 362.83 | 0.43 | 0.0 | PRO_367_A; MET_371_A; MET_372_A; LEU_373_A; GLN_374_A; GLN_377_A; CYS_379_A; LEU_404_A; THR_447_A; LYS_449_A; TRP_454_A; ILE_456_A; ASN_476_A; MET_478_A.                                                                   |
| P_8  | 152.06 | 304.69 | 0.31 | 0.0 | MET_372_A; LEU_373_A; GLN_374_A; PRO_375_A; GLU_376_A; LEU_404_A; ILE_405_A; GLU_406_A; THR_407_A; ILE_425_A; CYS_426_A.                                                                                                    |
| P_9  | 149.63 | 131.67 | 0.44 | 0.0 | ALA_294_A; LYS_342_A; ASN_343_A; ASN_344_A; <b>ASP_345_A</b> ; ILE_346_A; ALA_423_A; MET_424_A; ASP_458_A; SER_460_A; TRP_461_A; VAL_473_A; TYR_474_A; GLY_475_A; ASN_476_A; VAL_477_A; PHE_480_A.                          |
| P_10 | 148.03 | 186.34 | 0.37 | 0.0 | LEU_263_A; PRO_264_A; GLY_265_A; ALA_266_A; TRP_267_A; PRO_268_A; TRP_269_A; GLN_270_A; VAL_271_A; ILE_285_A; PHE_311_A; ALA_312_A; GLY_313_A; ILE_314_A; LEU_315_A; ASP_359_A; LEU_360_A; VAL_361_A; TRP_384_A; LEU_397_A. |
| P_11 | 121.54 | 413.02 | 0.14 | 0.0 | SER_162_A; SER_163_A; GLN_164_A; ARG_165_A; HIS_169_A; MET_210_A; TYR_226_A; SER_228_A.                                                                                                                                     |
| P_12 | 113.22 | 271.91 | 0.21 | 0.0 | HIS_274_A; ASN_277_A; THR_309_A; ALA_310_A; PHE_311_A; MET_320_A; ALA_324_A; GLY_325_A.                                                                                                                                     |
| P_13 | 113.09 | 204.89 | 0.21 | 0.0 | ALA_312_A; GLY_313_A ; TYR_322_A; GLY_323_A; ALA_324_A; LEU_355_A; THR_356_A; ASN_358_A.                                                                                                                                    |

|      |        |        |      |     |                                                                                                                                           |
|------|--------|--------|------|-----|-------------------------------------------------------------------------------------------------------------------------------------------|
| P_14 | 110.66 | 272.01 | 0.26 | 0.0 | TYR_152_A; ILE_157_A; GLN_159_A; PRO_170_A; GLY_199_A;<br>ILE_200_A; VAL_201_A; SER_204_A; GLY_205_A; SER_206_A;<br>THR_207_A; VAL_236_A. |
|------|--------|--------|------|-----|-------------------------------------------------------------------------------------------------------------------------------------------|

## REFERENCES

1. Lin LT, Hsu WC, Lin CC. Antiviral natural products and herbal medicines. *Journal of traditional and complementary medicine*. 2014 Jan 1;4(1):24-35.
2. Swamy MK, Arumugam G, Kaur R, Ghasemzadeh A, Yusoff MM, Sinniah UR. GC-MS based metabolite profiling, antioxidant and antimicrobial properties of different solvent extracts of Malaysian *Plectranthus amboinicus* leaves. *Evidence-Based Complementary and Alternative Medicine*. 2017 Jan 1;2017.
3. Pervaiz I, Ahmad S, Arshad A, Khurshid U, Basit A. GC-MS metabolic profiling and anti-urease activity of non-polar fractions of *Calligonum Polygonoides* L.(Polygonaceae) and *Crateva Adansonii* DC. *Prodr.(Capparaceae)*. *Tropical Journal of Pharmaceutical Research*. 2019 Sep 1;18(9):1955-60.
4. Moghaddam E, Teoh BT, Sam SS, Lani R, Hassandarvish P, Chik Z, Yueh A, Abubakar S, Zandi K. Baicalin, a metabolite of baicalein with antiviral activity against dengue virus. *Scientific reports*. 2014 Jun 26;4:5452.
5. Khan N, Syed DN, Ahmad N, Mukhtar H. Fisetin: a dietary antioxidant for health promotion. *Antioxidants & redox signaling*. 2013 Jul 10;19(2):151-62.
6. Jasso-Miranda C, Herrera-Camacho I, Flores-Mendoza LK, Dominguez F, Vallejo-Ruiz V, Sanchez-Burgos GG, Pando-Robles V, Santos-Lopez G, Reyes-Leyva J. Antiviral and immunomodulatory effects of polyphenols on macrophages infected with dengue virus serotypes 2 and 3 enhanced or not with antibodies. *Infection and drug resistance*. 2019;12:1833.
